# Supplementary material
Source: publisher figshare collection journal article supplement (https://acs.figshare.com/ndownloader/files/4782097)
Supplement: Supplementary file 1 [file 4782097]

data_global

_audit_creation_date               10-11-03


_publ_contact_author_name
;

Pierre BRAUNSTEIN

;
_publ_contact_author_address
;

Institut Le Bel, rue Blaise Pascal, 67000 STRASBOURG, FRANCE

;
_publ_contact_author_phone         '0390241308'
_publ_contact_author_fax           '0390241322'
_publ_contact_author_email         braunst@chimie.u-strasbg.fr

_publ_requested_journal            'Inorganic Chemistry'
_publ_contact_letter
;
;

_publ_requested_category            FM

_publ_section_title
;

Dinuclear Nickel and Palladium Complexes with Bridging
2,5-diamino-1,4-Benzoquinonediimines: Synthesis,
Structures and Catalytic Oligomerization of Ethylene.


;

loop_
_publ_author_name
_publ_author_address
'TAQUET J-P'
;

 Laboratoire de Chimie de Coordination, UMR CNRS 7513
 Universit\'e Louis Pasteur
 4, rue Blaise Pascal
 F-67070 STRASBOURG Cedex
 France

;

'SIRI Olivier'
;

 Laboratoire de Chimie de Coordination, UMR CNRS 7513
 Universit\'e Louis Pasteur
 4, rue Blaise Pascal
 F-67070 STRASBOURG Cedex
 France

;

'BRAUNSTEIN Pierre'
;

 Laboratoire de Chimie de Coordination, UMR CNRS 7513
 Universit\'e Louis Pasteur
 4, rue Blaise Pascal
 F-67070 STRASBOURG Cedex
 France

;

'WELTER Richard'
;

 Laboratoire DECMET, UMR CNRS 7513
 Universit\'e Louis Pasteur
 4, rue Blaise Pascal
 67000 STRASBOURG
 France

;

_publ_section_abstract
; ?
;

_publ_section_comment
; ?
;

_publ_section_exptl_prep
; ?
;


_publ_section_exptl_refinement
; ?
;

_publ_section_references
;


Burla, M.C., Camalli, M., Cascarano, G.,Giacovazzo, C., Polidori, G.,
Spagna, R. &Viterbo, D. (1989).  SIR.  J. Appl. Cryst. 22, 389-393.

OpenMoleN, Interactive Intelligent Structure  solution (1997)
Nonius B.V., Delft, The Netherlands.

KappaCCD Operation Manual (1997), Nonius B.V., Delft, The Nederlands.

Otwinowski, Z. & Minor, W. (1997), Methods in Enzymology, 276, 307-326.

Walker, N. & Stuart, D. (1983). Acta Cryst.,  A39, 158-166.

;

_publ_section_figure_captions
; ?
;

_publ_section_acknowledgements
; ?
;


#===============================================================================
 # If more than one structure is reported, sections 5-10 should be filled in
 # per structure. For each data set, replace the ? in the data_? line below
 # by a unique identifier.


data_st632

#===============================================================================

# 5. CHEMICAL DATA

_chemical_name_systematic
; ?
;
_chemical_name_common              ?
_chemical_formula_moiety           'C42 H68 N4 Pt2'
_chemical_formula_structural       ?
_chemical_formula_analytical       ?
_chemical_formula_sum              'C42 H68 N4 Pt2'
_chemical_formula_weight           1019.22
_chemical_melting_point            ?
_chemical_compound_source          ?

 loop_
     _atom_type_symbol
     _atom_type_description
     _atom_type_scat_dispersion_real
     _atom_type_scat_dispersion_imag
     _atom_type_scat_source
 C  ?  0.002  0.002 International_Tables_Vol_IV_Table_2.3.1
 H  ?  0.000  0.000 International_Tables_Vol_IV_Table_2.3.1
 N  ?  0.004  0.003 International_Tables_Vol_IV_Table_2.3.1
 Pt ? -2.352  8.388 International_Tables_Vol_IV_Table_2.3.1


#===============================================================================

 # 6. CRYSTAL DATA

_symmetry_cell_setting              monoclinic
_symmetry_space_group_name_H-M      'P 1 21/c 1'
_symmetry_space_group_name_Hall     '-P 2ybc'
loop_
     _symmetry_equiv_pos_as_xyz
     'x,y,z'
     -x,1/2+y,1/2-z
     -x,-y,-z
     +x,1/2-y,1/2+z
_cell_length_a                     9.829(1)
_cell_length_b                     22.615(1)
_cell_length_c                     10.618(1)
_cell_angle_alpha                  90
_cell_angle_beta                   117.474(5)
_cell_angle_gamma                  90
_cell_volume                       2094.0(3)
_cell_formula_units_Z              2
_cell_measurement_temperature      173
_cell_measurement_reflns_used     12114
_cell_measurement_theta_min         1.4
_cell_measurement_theta_max        28.3
_cell_special_details
;
Cell parameters refined using Scalepack part of DENZO
 Z. Otwinowski, W. Minor, 1997
;

_exptl_crystal_description         prism
_exptl_crystal_colour              'green'
_exptl_crystal_size_max            0.20
_exptl_crystal_size_mid            0.16
_exptl_crystal_size_min            0.15
_exptl_crystal_density_meas        ?
_exptl_crystal_density_diffrn      1.62
_exptl_crystal_density_method      'none'

_exptl_crystal_F_000               1008
_exptl_absorpt_coefficient_mu      6.705
_exptl_absorpt_correction_type     refdelf_(Walker_&_Stuart,_1983)
_exptl_absorpt_correction_T_min    0.273
_exptl_absorpt_correction_T_max    0.398

#===============================================================================

# 7. EXPERIMENTAL DATA

_diffrn_special_details
; ?
;

_diffrn_ambient_temperature        173
_diffrn_radiation_wavelength       0.71073
_diffrn_radiation_type             Mo-K\a

_diffrn_source                     xray_tube

_diffrn_radiation_monochromator    graphite
_diffrn_measurement_device_type    KappaCCD
_diffrn_measurement_method         '\p scans'

_diffrn_measurement_details
;
  12114 reflections were collected using program Collect
 ("Collect" Data collection software, Nonius B.V., 1998)
 The conditions were as follow : crystal to detector distance =  36. mm.
 Scan angle =  2.0 deg 1 scans of   30 sec per frame.
 Data collection was divided into  1 set(s)
 with the following starting angles and number of frames :

 Set 1 Theta =   -6.40 Omega =    0.00 Kappa =    0.00   91 frames
 Friedel pairs were averaged. Internal R = 0.07
;

_diffrn_standards_number           ?
_diffrn_standards_interval_count   ?
_diffrn_standards_interval_time    ?
_diffrn_standards_decay_%          0

_diffrn_reflns_number              12114
_diffrn_reflns_av_R_equivalents    0.070
_diffrn_reflns_av_sigmaI/netI      0.333
_diffrn_reflns_limit_h_min         0
_diffrn_reflns_limit_h_max         13
_diffrn_reflns_limit_k_min         0
_diffrn_reflns_limit_k_max         30
_diffrn_reflns_limit_l_min         -12
_diffrn_reflns_limit_l_max         11
_diffrn_reflns_theta_min           2.5
_diffrn_reflns_theta_max           28.27

_reflns_number_total               4933
_reflns_number_gt                  3184
_reflns_threshold_expression       >3.0\s(I)

_computing_structure_solution      Direct_methods_(SIR,_Burla_et_al.,_1989)
_computing_structure_refinement    LSFM_OpenMoleN_(_1997)
_computing_molecular_graphics      ?
_computing_publication_material    CIFGEN_IN_OpenMoleN_(_1997)

#===============================================================================

_refine_special_details
;
 Hydrogen atoms were generated according to stereochemistry
 and refined using a riding model in OpenMolen.
 Large Non-Solvent C Ueq(max)/Ueq(min) are present
 on the trimethyl groups and are related to a rather usual
 slight thermal agitation in such groups. 
 
;

# 8. REFINEMENT DATA


_refine_ls_structure_factor_coef   F
_refine_ls_matrix_type             full
_refine_ls_weighting_scheme        sigma
_refine_ls_hydrogen_treatment      noref
_refine_ls_extinction_method       none
_refine_ls_extinction_expression   ?
_refine_ls_extinction_coef         ?
_refine_ls_abs_structure_Flack     ?
_refine_ls_number_reflns           3184
_refine_ls_number_parameters       205
_refine_ls_number_restraints       0
_refine_ls_number_constraints      12
_refine_ls_R_factor_all            0.086
_refine_ls_R_factor_gt             0.048
_refine_ls_wR_factor_all           0.168
_refine_ls_wR_factor_ref           0.072
_refine_ls_goodness_of_fit_all     1.431
_refine_ls_goodness_of_fit_ref     1.354
_refine_ls_shift/su_max            0.002
_refine_ls_shift/esd_mean          0.000
_refine_diff_density_max           1.798
_refine_diff_density_min           -1.475

#===============================================================================

# 9. ATOMIC COORDINATES AND THERMAL PARAMETERS

loop_
_atom_site_label
_atom_site_fract_x
_atom_site_fract_y
_atom_site_fract_z
_atom_site_U_iso_or_equiv
_atom_site_adp_type
_atom_site_calc_flag
_atom_site_calc_attached_atom
_atom_site_type_symbol
PT  0.13413(4)  0.10092(2)  0.91731(3)  0.0328(2)  Uani  ? ?  Pt
N1  0.3550(7)  0.0859(3)  1.0789(6)  0.030(3)  Uani  ? ?  N
C1  0.4320(8)  0.0438(4)  1.0504(7)  0.025(3)  Uani  ? ?  C
C2  0.3620(8)  0.0282(3)  0.8930(7)  0.023(3)  Uani  ? ?  C
C3  0.5652(9)  0.0145(4)  1.1459(8)  0.032(4)  Uani  ? ?  C
N2  0.2348(7)  0.0571(3)  0.8091(6)  0.028(3)  Uani  ? ?  N
C4  0.422(1)  0.1121(4)  1.2193(8)  0.037(4)  Uani  ? ?  C
C5  0.525(1)  0.1662(4)  1.2399(8)  0.042(4)  Uani  ? ?  C
C6  0.449(2)  0.2092(5)  1.117(2)  0.085(8)  Uani  ? ?  C
C7  0.675(1)  0.1503(6)  1.243(2)  0.088(6)  Uani  ? ?  C
C8  0.547(1)  0.1984(5)  1.377(2)  0.0876  Uani  ? ?  C
C9  0.1653(9)  0.0516(4)  0.6561(8)  0.034(4)  Uani  ? ?  C
C10  0.216(1)  0.0989(4)  0.582(1)  0.049(5)  Uani  ? ?  C
C11  0.173(1)  0.1603(5)  0.606(1)  0.104(7)  Uani  ? ?  C
C12  0.388(1)  0.0975(6)  0.637(1)  0.105(7)  Uani  ? ?  C
C13  0.125(2)  0.0876(7)  0.425(1)  0.078(9)  Uani  ? ?  C
C14  0.044(1)  0.1573(4)  1.0227(8)  0.041(5)  Uani  ? ?  C
C15  0.025(2)  0.1014(5)  1.055(1)  0.074(8)  Uani  ? ?  C
C16  -0.127(1)  0.0675(7)  0.993(1)  0.101(7)  Uani  ? ?  C
C17  -0.206(1)  0.0542(6)  0.851(1)  0.075(5)  Uani  ? ?  C
C18  -0.162(1)  0.0772(6)  0.758(1)  0.0752  Uani  ? ?  C
C19  -0.080(1)  0.1223(5)  0.7467(9)  0.048(5)  Uani  ? ?  C
C20  -0.127(1)  0.1846(5)  0.772(1)  0.067(7)  Uani  ? ?  C
C21  -0.077(2)  0.1972(6)  0.920(1)  0.066(7)  Uani  ? ?  C
H1  0.6079  0.0248  1.2435  0.0432  Uiso  calc  C3  H
H2  0.4818  0.0827  1.2857  0.0458  Uiso  calc  C4  H
H3  0.3405  0.1239  1.2385  0.0458  Uiso  calc  C4  H
H4  0.5149  0.2422  1.1322  0.1362  Uiso  calc  C6  H
H5  0.4311  0.1900  1.0312  0.1362  Uiso  calc  C6  H
H6  0.3547  0.2223  1.1112  0.1362  Uiso  calc  C6  H
H7  0.7340  0.1851  1.2561  0.1475  Uiso  calc  C7  H
H8  0.7294  0.1238  1.3194  0.1475  Uiso  calc  C7  H
H9  0.6560  0.1320  1.1562  0.1475  Uiso  calc  C7  H
H10  0.6108  0.2321  1.3925  0.1473  Uiso  calc  C8  H
H11  0.4505  0.2105  1.3677  0.1473  Uiso  calc  C8  H
H12  0.5946  0.1722  1.4558  0.1473  Uiso  calc  C8  H
H13  0.0573  0.0543  0.6196  0.0445  Uiso  calc  C9  H
H14  0.1911  0.0138  0.6341  0.0445  Uiso  calc  C9  H
H15  0.2054  0.1883  0.5587  0.1333  Uiso  calc  C11  H
H16  0.0644  0.1626  0.5687  0.1333  Uiso  calc  C11  H
H17  0.2204  0.1686  0.7044  0.1333  Uiso  calc  C11  H
H18  0.4172  0.1269  0.5898  0.1336  Uiso  calc  C12  H
H19  0.4376  0.1051  0.7360  0.1336  Uiso  calc  C12  H
H20  0.4180  0.0597  0.6193  0.1336  Uiso  calc  C12  H
H21  0.1526  0.1158  0.3740  0.1131  Uiso  calc  C13  H
H22  0.1464  0.0490  0.4036  0.1131  Uiso  calc  C13  H
H23  0.0188  0.0910  0.3974  0.1131  Uiso  calc  C13  H
H24  0.1451  0.1730  1.0702  0.0555  Uiso  calc  C14  H
H25  0.1140  0.0812  1.1220  0.1027  Uiso  calc  C15  H
H26  -0.1952  0.0903  1.0151  0.1210  Uiso  calc  C16  H
H27  -0.1069  0.0309  1.0426  0.1210  Uiso  calc  C16  H
H28  -0.2926  0.0287  0.8178  0.1077  Uiso  calc  C17  H
H29  -0.0886  0.1254  0.6541  0.0640  Uiso  calc  C19  H
H30  -0.2019  0.0540  0.6739  0.1073  Uiso  calc  C18  H
H31  -0.2358  0.1874  0.7228  0.0993  Uiso  calc  C20  H
H32  -0.0836  0.2130  0.7355  0.0993  Uiso  calc  C20  H
H33  -0.0383  0.2365  0.9375  0.0989  Uiso  calc  C21  H
H34  -0.1639  0.1946  0.9365  0.0989  Uiso  calc  C21  H


loop_
_atom_site_aniso_label
_atom_site_aniso_U_11
_atom_site_aniso_U_22
_atom_site_aniso_U_33
_atom_site_aniso_U_12
_atom_site_aniso_U_13
_atom_site_aniso_U_23
_atom_site_aniso_type_symbol
PT  0.0232(1)  0.0396(2)  0.0386(2)  0.0078(1)  0.0124(1)  0.0009(1)  Pt
N1  0.021(3)  0.035(4)  0.036(4)  0.005(3)  0.008(2)  -0.001(3)  N
C1  0.019(3)  0.032(4)  0.027(3)  -0.003(3)  0.008(2)  -0.002(3)  C
C2  0.025(3)  0.024(4)  0.020(3)  0.002(3)  0.013(2)  0.001(3)  C
C3  0.026(4)  0.036(4)  0.034(4)  0.004(3)  0.010(3)  0.001(3)  C
N2  0.027(3)  0.037(4)  0.022(3)  0.003(3)  0.011(2)  -0.003(3)  N
C4  0.049(4)  0.029(4)  0.036(4)  0.005(3)  0.026(3)  -0.001(3)  C
C5  0.046(4)  0.048(5)  0.033(4)  -0.016(4)  0.017(3)  -0.013(4)  C
C6  0.082(9)  0.057(7)  0.13(1)  -0.019(6)  0.013(7)  0.040(6)  C
C7  0.060(5)  0.050(5)  0.228(9)  -0.024(4)  0.064(5)  -0.023(6)  C
C8  0.0597  0.0492  0.2284  -0.0235  0.0643  -0.0227  C
C9  0.032(4)  0.044(5)  0.027(3)  0.002(4)  0.014(2)  0.001(3)  C
C10  0.045(5)  0.052(6)  0.051(5)  0.007(4)  0.016(4)  0.023(4)  C
C11  0.066(8)  0.148(6)  0.116(6)  0.022(6)  0.062(5)  0.089(5)  C
C12  0.066(6)  0.15(1)  0.116(5)  0.022(6)  0.062(4)  0.089(5)  C
C13  0.11(1)  0.10(1)  0.043(6)  0.017(7)  0.029(6)  0.024(5)  C
C14  0.034(4)  0.045(5)  0.043(4)  0.007(4)  0.013(3)  -0.004(4)  C
C15  0.072(9)  0.079(9)  0.072(7)  -0.006(6)  0.021(6)  0.002(6)  C
C16  0.088(6)  0.11(1)  0.108(7)  -0.035(7)  0.067(4)  -0.008(7)  C
C17  0.052(5)  0.081(6)  0.101(6)  -0.022(4)  0.024(4)  0.004(5)  C
C18  0.0520  0.0803  0.1016  -0.0220  0.0237  0.0043  C
C19  0.038(5)  0.065(6)  0.044(4)  0.007(5)  0.018(3)  0.000(5)  C
C20  0.094(8)  0.037(6)  0.085(7)  0.028(5)  0.030(6)  0.010(5)  C
C21  0.094(8)  0.036(7)  0.085(6)  0.028(6)  0.030(6)  0.010(6)  C

# 10. MOLECULAR GEOMETRY


loop_
_geom_bond_atom_site_label_1
_geom_bond_atom_site_label_2
_geom_bond_distance
_geom_bond_site_symmetry_1
_geom_bond_site_symmetry_2
_geom_bond_publ_flag
PT  N1  2.082(7)  . .  ?
PT  N2  2.082(7)  . .  ?
PT  C14  2.14(1)  . .  ?
PT  C15  2.17(2)  . .  ?
PT  C19  2.10(1)  . .  ?
N1  C1  1.33(1)  . .  ?
N1  C4  1.45(1)  . .  ?
C1  C2  1.53(1)  . .  ?
C1  C3  1.40(1)  . .  ?
C2  C3  1.37(1)  . 3_657  ?
C2  N2  1.33(1)  . .  ?
N2  C9  1.45(1)  . .  ?
C4  C5  1.54(1)  . .  ?
C5  C6  1.52(2)  . .  ?
C5  C7  1.50(2)  . .  ?
C5  C8  1.55(2)  . .  ?
C9  C10  1.55(1)  . .  ?
C10  C11  1.51(2)  . .  ?
C10  C12  1.51(2)  . .  ?
C10  C13  1.51(2)  . .  ?
C14  C15  1.34(2)  . .  ?
C14  C21  1.49(2)  . .  ?
C15  C16  1.54(2)  . .  ?
C16  C17  1.38(2)  . .  ?
C17  C18  1.35(2)  . .  ?
C18  C19  1.34(2)  . .  ?
C19  C20  1.54(2)  . .  ?
C20  C21  1.44(2)  . .  ?

loop_
     _geom_contact_atom_site_label_1
     _geom_contact_atom_site_label_2
     _geom_contact_distance
     _geom_contact_site_symmetry_1
     _geom_contact_site_symmetry_2
     _geom_contact_publ_flag
     ?   ?   ?   ?   ?   ?

loop_
_geom_angle_atom_site_label_1
_geom_angle_atom_site_label_2
_geom_angle_atom_site_label_3
_geom_angle
_geom_angle_site_symmetry_1
_geom_angle_site_symmetry_2
_geom_angle_site_symmetry_3
_geom_angle_publ_flag
N1  PT  N2  78.3(3)  . .  .  ?
N1  PT  C14  101.0(3)  . .  .  ?
N1  PT  C15  95.5(5)  . .  .  ?
N1  PT  C19  174.6(4)  . .  .  ?
N2  PT  C14  171.8(4)  . .  .  ?
N2  PT  C15  151.7(4)  . .  .  ?
N2  PT  C19  100.1(4)  . .  .  ?
C14  PT  C15  36.3(4)  . .  .  ?
C14  PT  C19  79.8(4)  . .  .  ?
C15  PT  C19  88.3(5)  . .  .  ?
PT  N1  C1  114.5(6)  . .  .  ?
PT  N1  C4  125.9(6)  . .  .  ?
C1  N1  C4  119.3(7)  . .  .  ?
N1  C1  C2  113.4(7)  . .  .  ?
N1  C1  C3  127.7(8)  . .  .  ?
C2  C1  C3  118.8(7)  . .  .  ?
C1  C2  C3  117.2(7)  . .  3_657  ?
C1  C2  N2  115.5(7)  . .  .  ?
C3  C2  N2  127.2(7)  3_657 .  .  ?
C1  C3  C2  123.9(8)  . .  3_657  ?
PT  N2  C2  113.9(5)  . .  .  ?
PT  N2  C9  124.2(6)  . .  .  ?
C2  N2  C9  121.5(7)  . .  .  ?
N1  C4  C5  115.4(8)  . .  .  ?
C4  C5  C6  111.0(9)  . .  .  ?
C4  C5  C7  112(1)  . .  .  ?
C4  C5  C8  107.8(9)  . .  .  ?
C6  C5  C7  105(1)  . .  .  ?
C6  C5  C8  107(1)  . .  .  ?
C7  C5  C8  112(1)  . .  .  ?
N2  C9  C10  114.7(8)  . .  .  ?
C9  C10  C11  111(1)  . .  .  ?
C9  C10  C12  110.8(9)  . .  .  ?
C9  C10  C13  106(1)  . .  .  ?
C11  C10  C12  107(1)  . .  .  ?
C11  C10  C13  105(1)  . .  .  ?
C12  C10  C13  114(1)  . .  .  ?
PT  C14  C15  73.3(9)  . .  .  ?
PT  C14  C21  111.1(8)  . .  .  ?
C15  C14  C21  126(1)  . .  .  ?
PT  C15  C14  70.4(8)  . .  .  ?
PT  C15  C16  113(1)  . .  .  ?
C14  C15  C16  125(1)  . .  .  ?
C15  C16  C17  121(1)  . .  .  ?
C16  C17  C18  120(1)  . .  .  ?
C17  C18  C19  140(1)  . .  .  ?
PT  C19  C18  98.8(9)  . .  .  ?
PT  C19  C20  108.8(8)  . .  .  ?
C18  C19  C20  115(1)  . .  .  ?
C19  C20  C21  113(1)  . .  .  ?
C14  C21  C20  115(1)  . .  .  ?

_diffrn_measured_fraction_theta_max    0.980
_diffrn_reflns_theta_full              27.27
_diffrn_measured_fraction_theta_full   0.980
